# Supplementary material for: Benchmarking Mechanistic Structural, Molecular Docking, ADMET and Biological Properties of Methyl- Imidazole Derivatives: Potential Anti-Cancer Agents
Source: Research Square preprint supplement (doi:10.21203/rs.3.rs-3934643/v1), 2024-02-15
Supplement: Supplementary file 2 [file cb660888a8894501bffde4a2.docx]

**Supporting informations**

**Docking calculations with SeeSAR software**

**Cancers proteins 3F66, 4XVE, 1XF0 and 5Y8Y**

**Molecule M1**

**LogS** = 2,965 (Intrinsic aqueous solubility)

**LogP** = 2,81

**BBB (Blood-Brain-Barrier) log ([brain]:[blood])** = 0,085

**TPSA (Topological Polar Surface Area)** = 27,1 Å2 (> 140 Å2 : bad, < 90 Å2 : good)


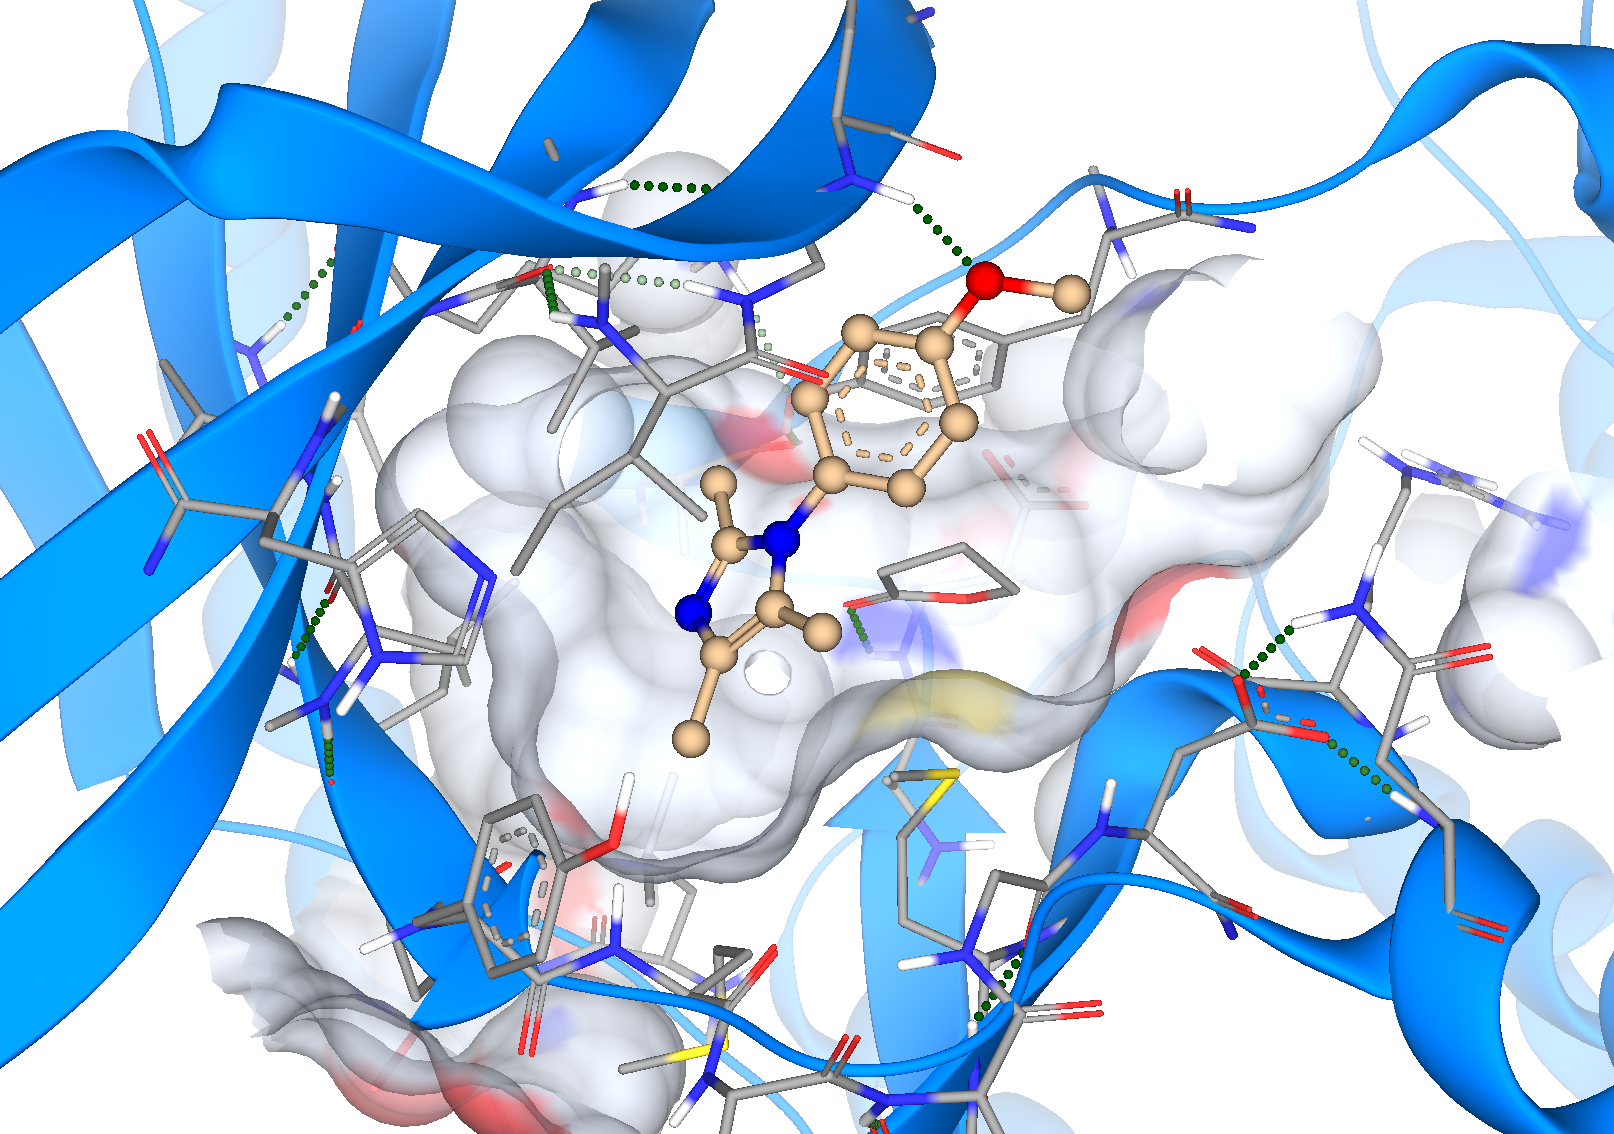

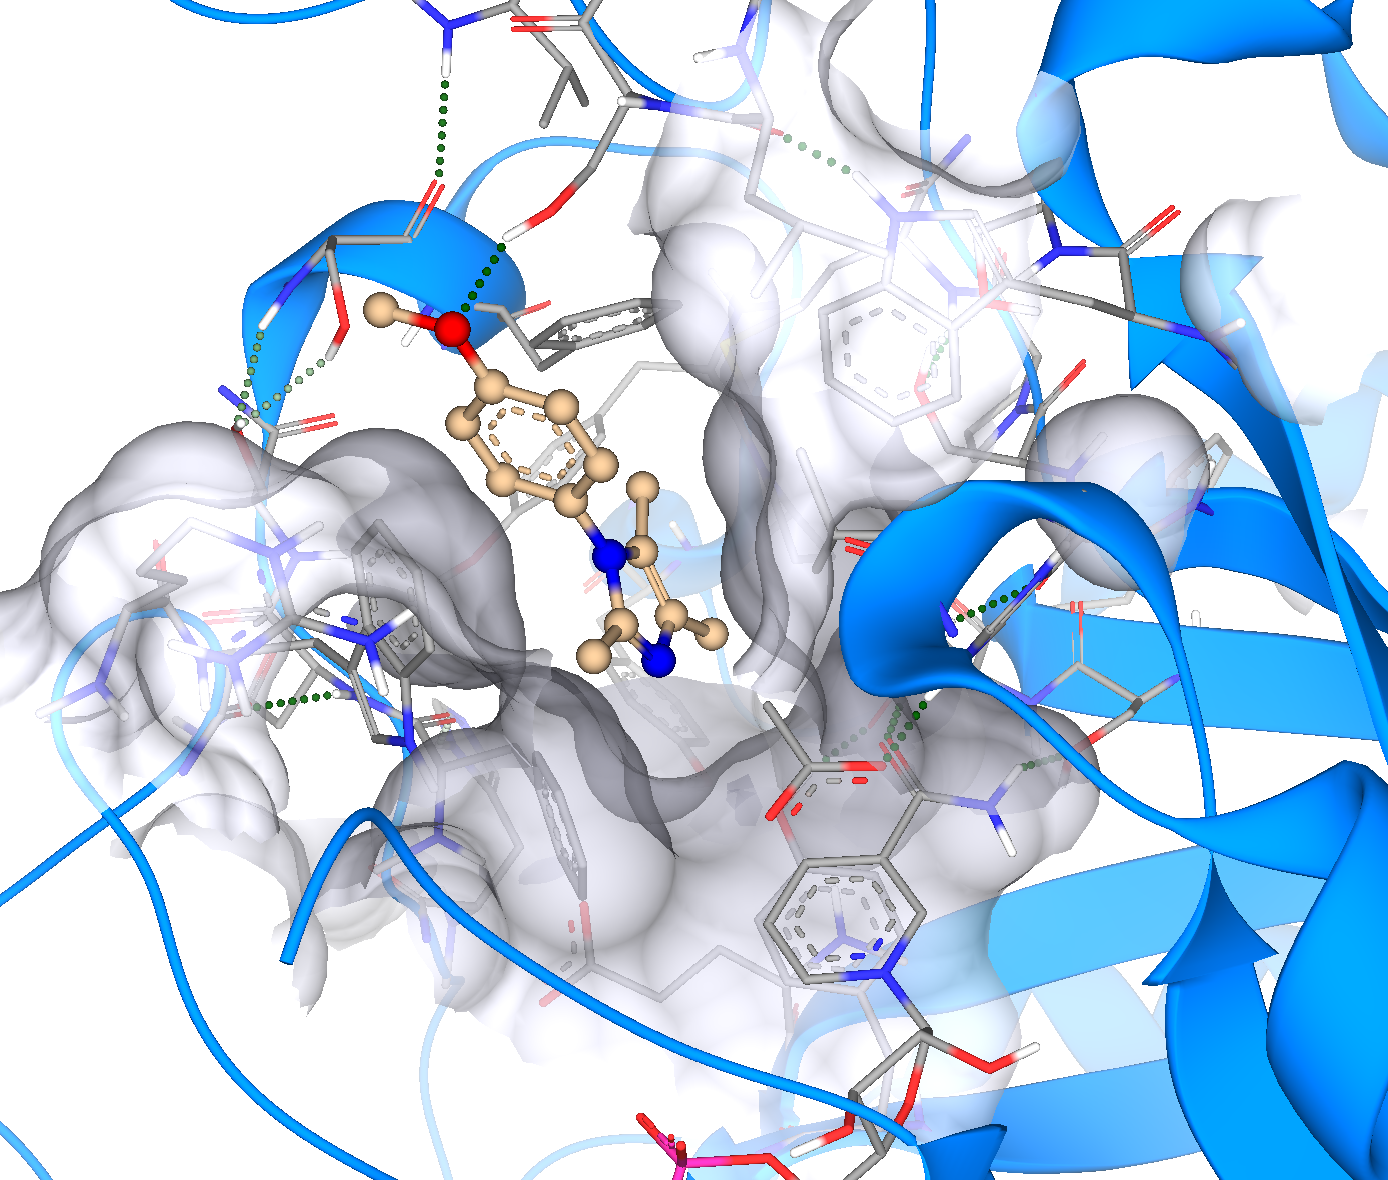


**M1 in 1XF0 M1 in 3F66**

**
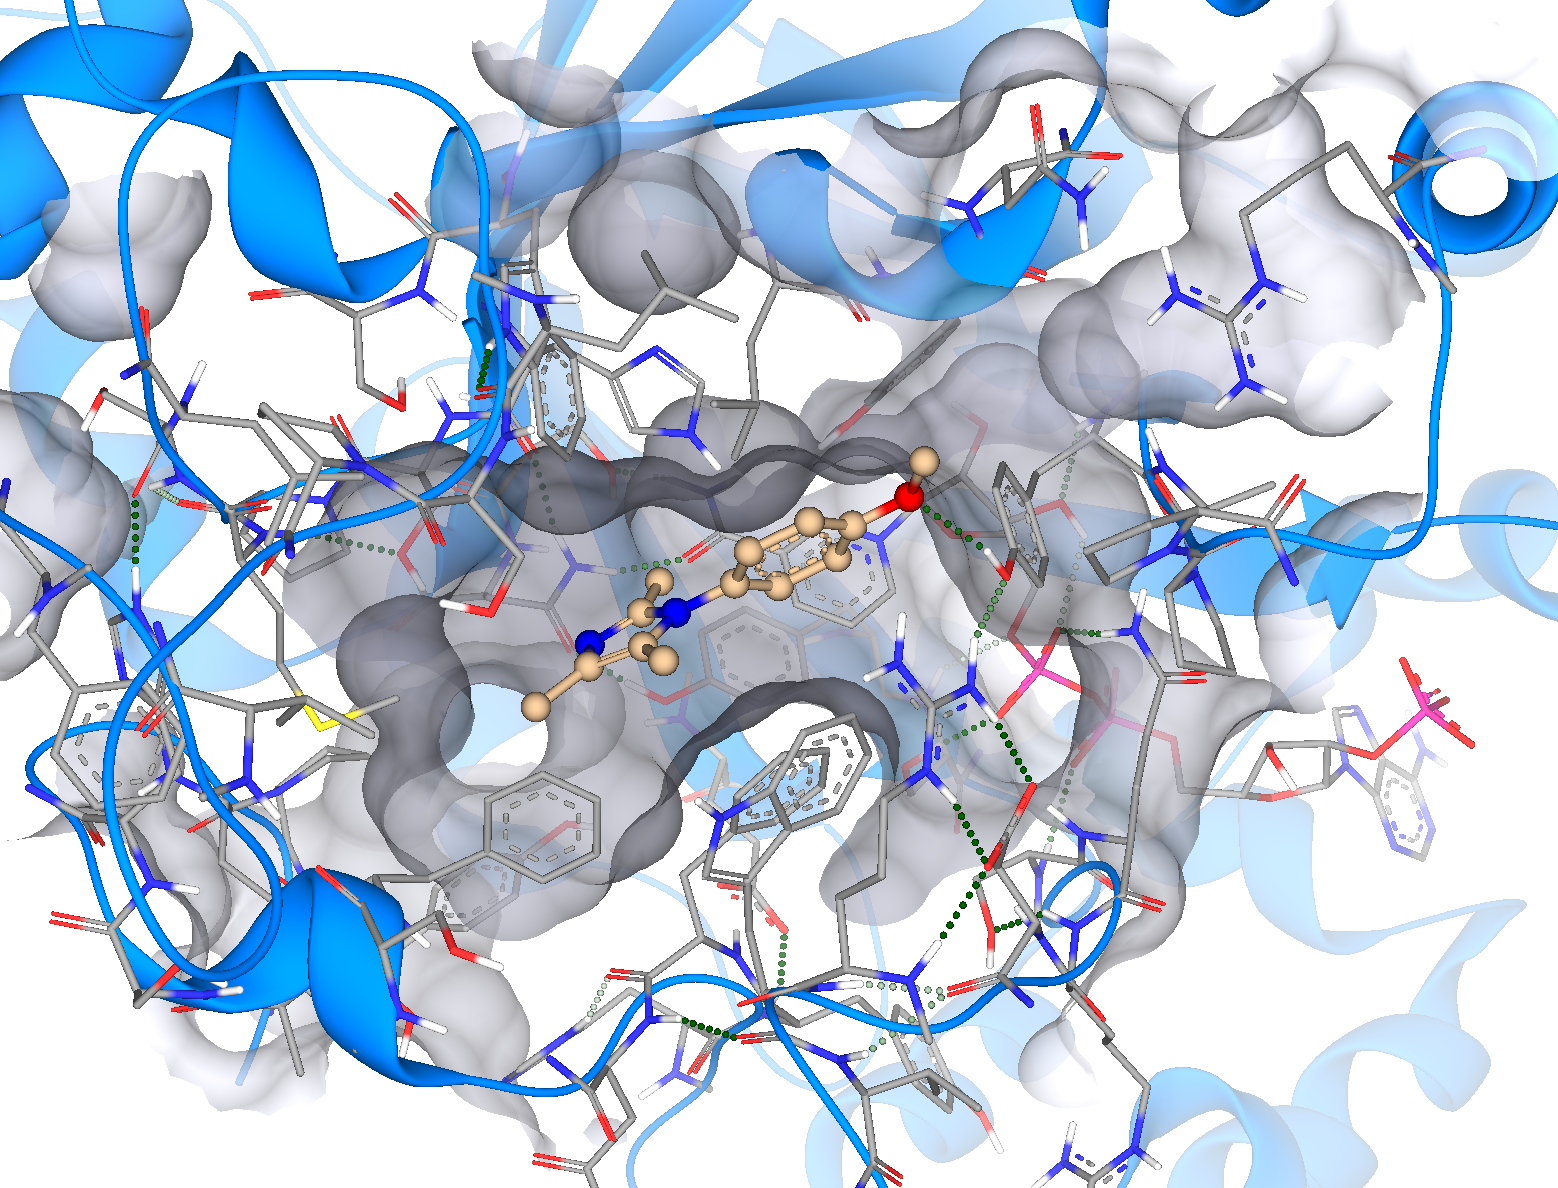
**

**
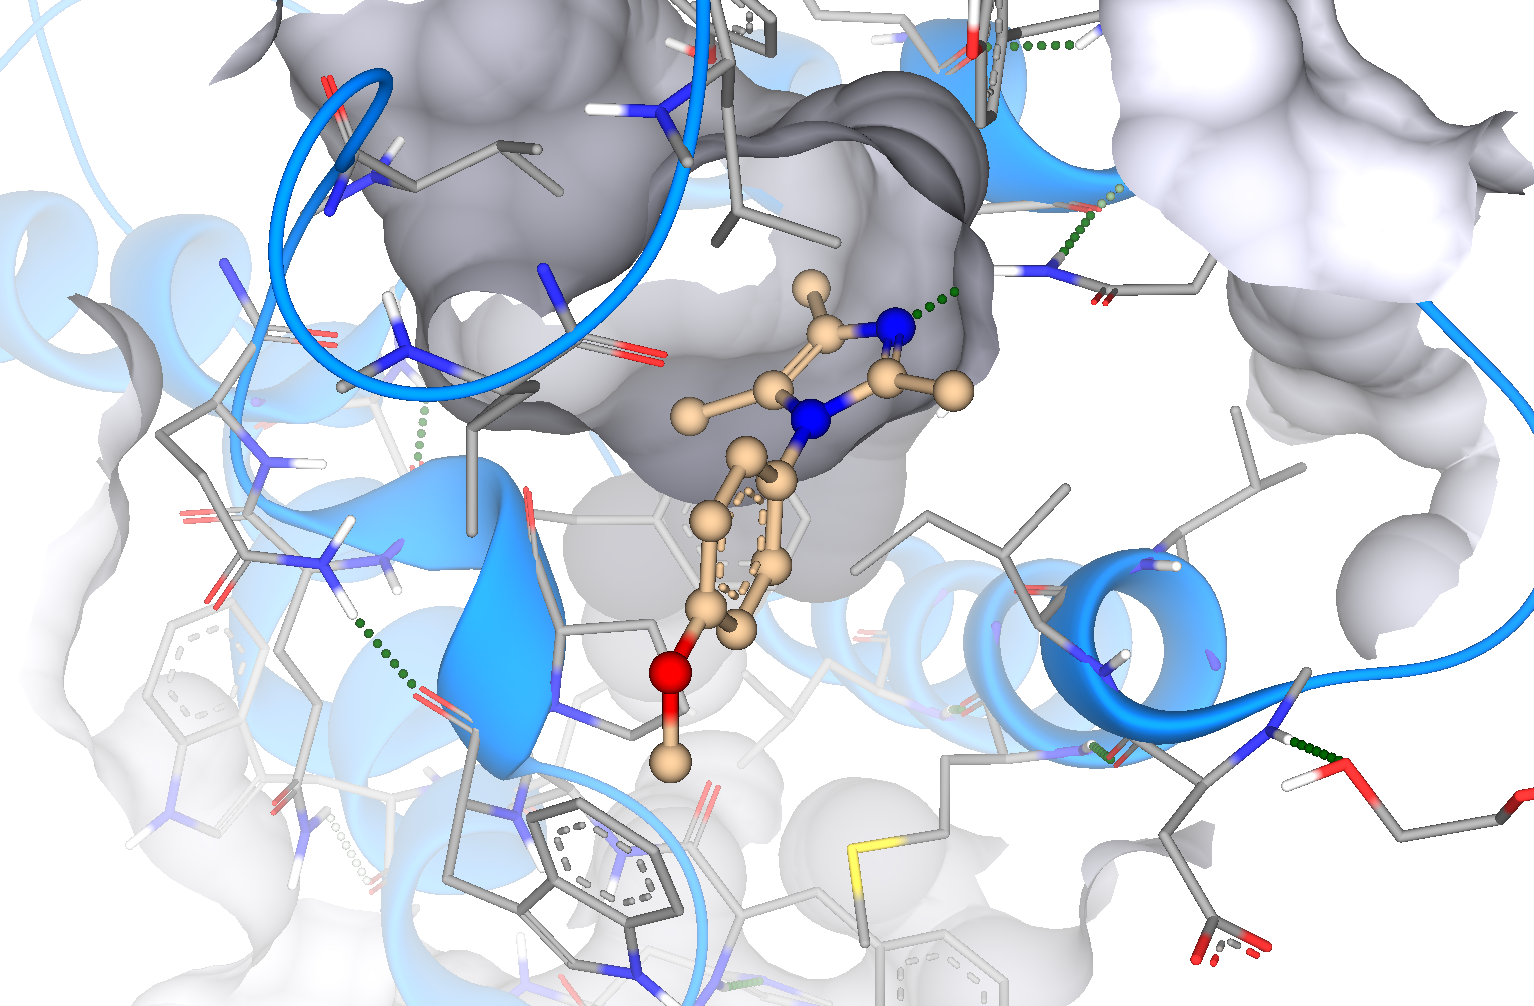
**

**M1 in 4XVE M1 in 5Y8Y**

**Molecule M2**

**LogS** = 4,485 (Intrinsic aqueous solubility)

**LogP** = 2,35

**BBB (Blood-Brain-Barrier) log ([brain]:[blood])** = 0,593

**TPSA (Topological Polar Surface Area)** = 75 Å2 (> 140 Å2 : bad, < 90 Å2 : good)

**
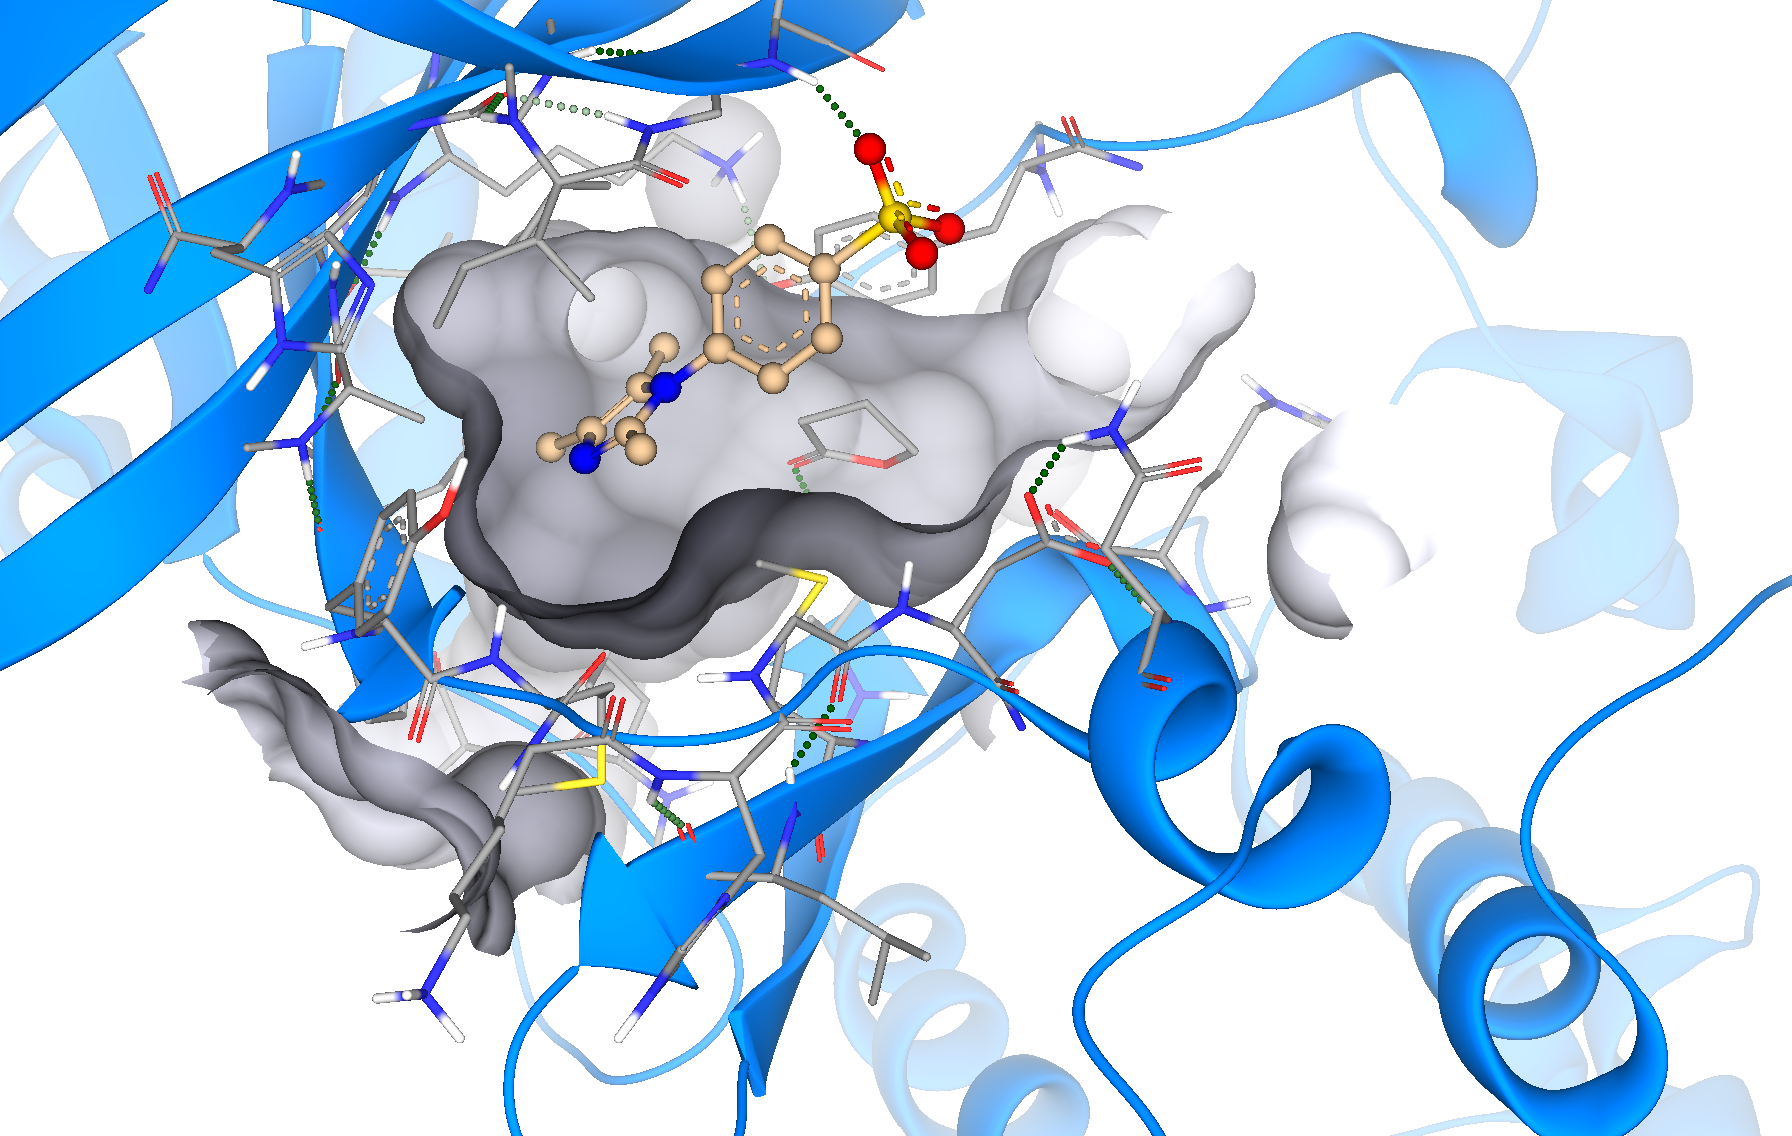

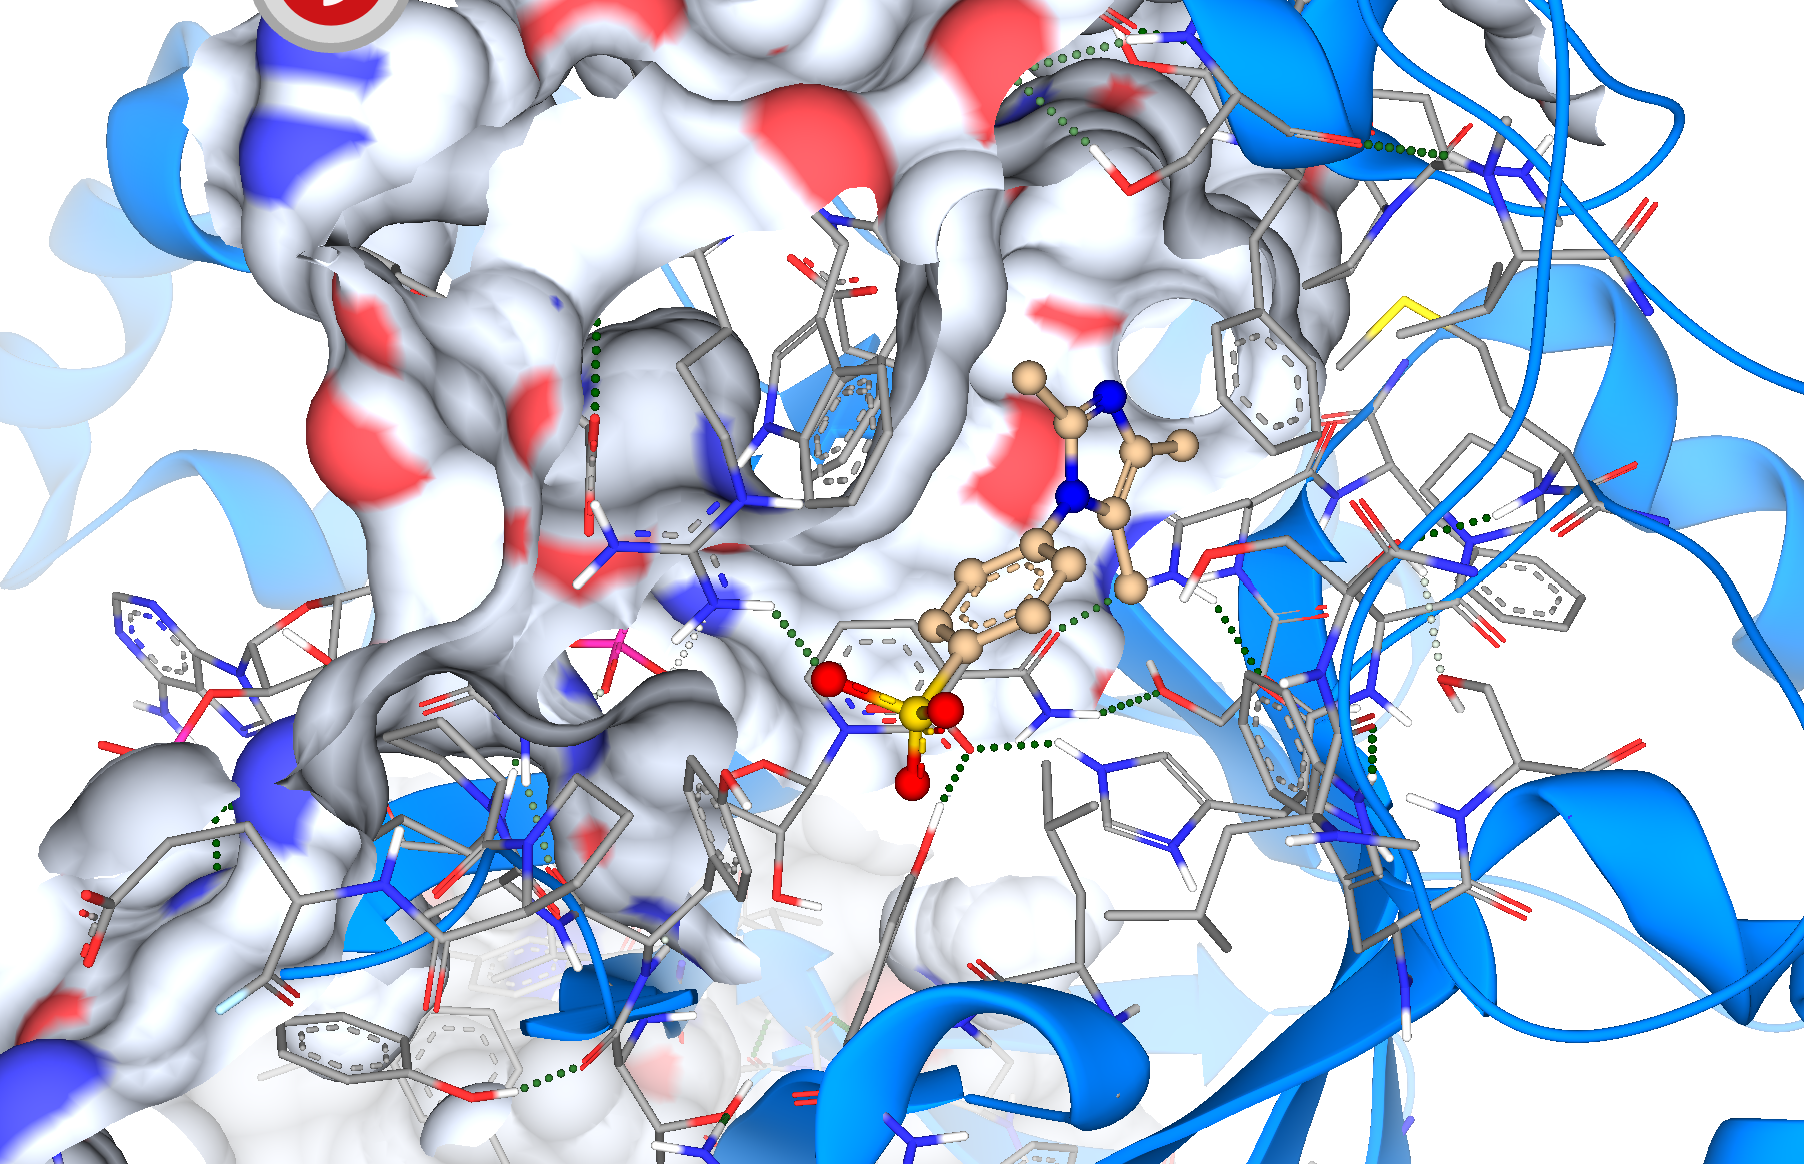
**

**M2 in 1XF0 M2 in 3F66**

**
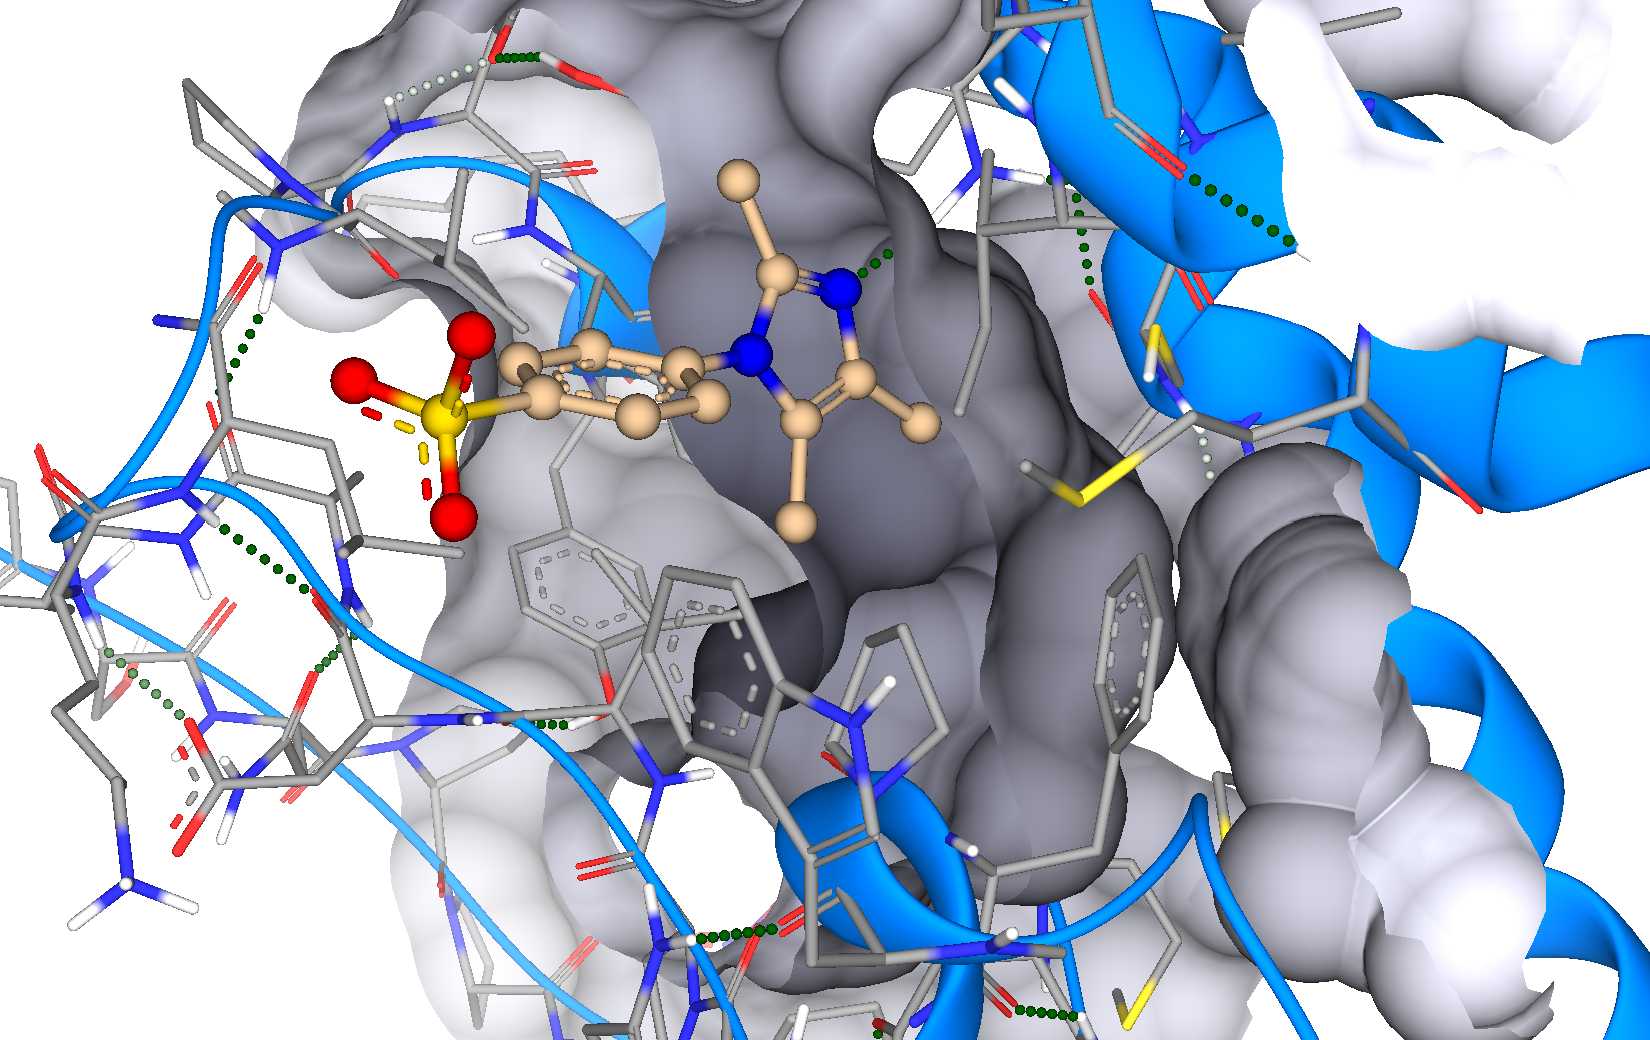

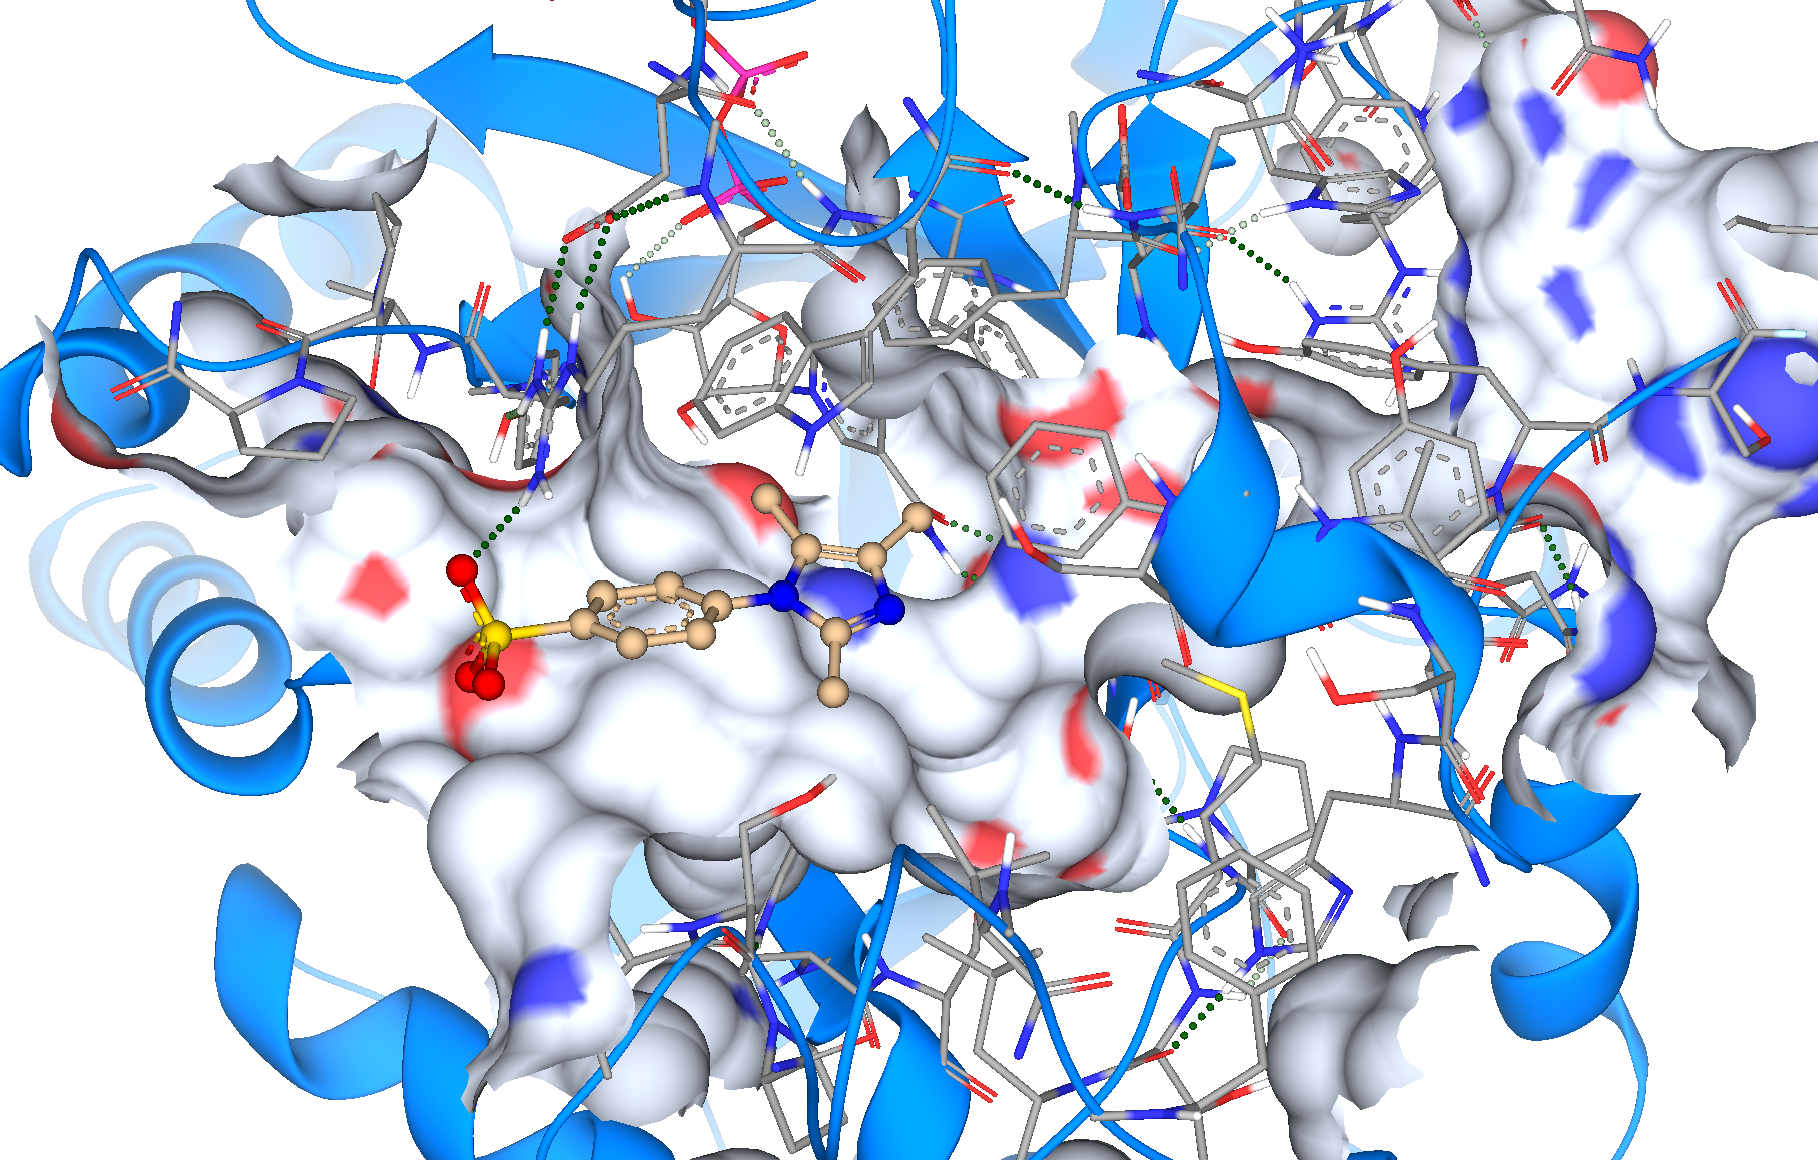
**

**M2 in 4XVE M2 in 5Y8Y**

**Molecule M3**

**LogS** = 2,871 (Intrinsic aqueous solubility)

**LogP** = 2,38

**BBB (Blood-Brain-Barrier) log ([brain]:[blood])** = -0,786

**TPSA (Topological Polar Surface Area)** = 61,5 Å2 (> 140 Å2 : bad, < 90 Å2 : good)


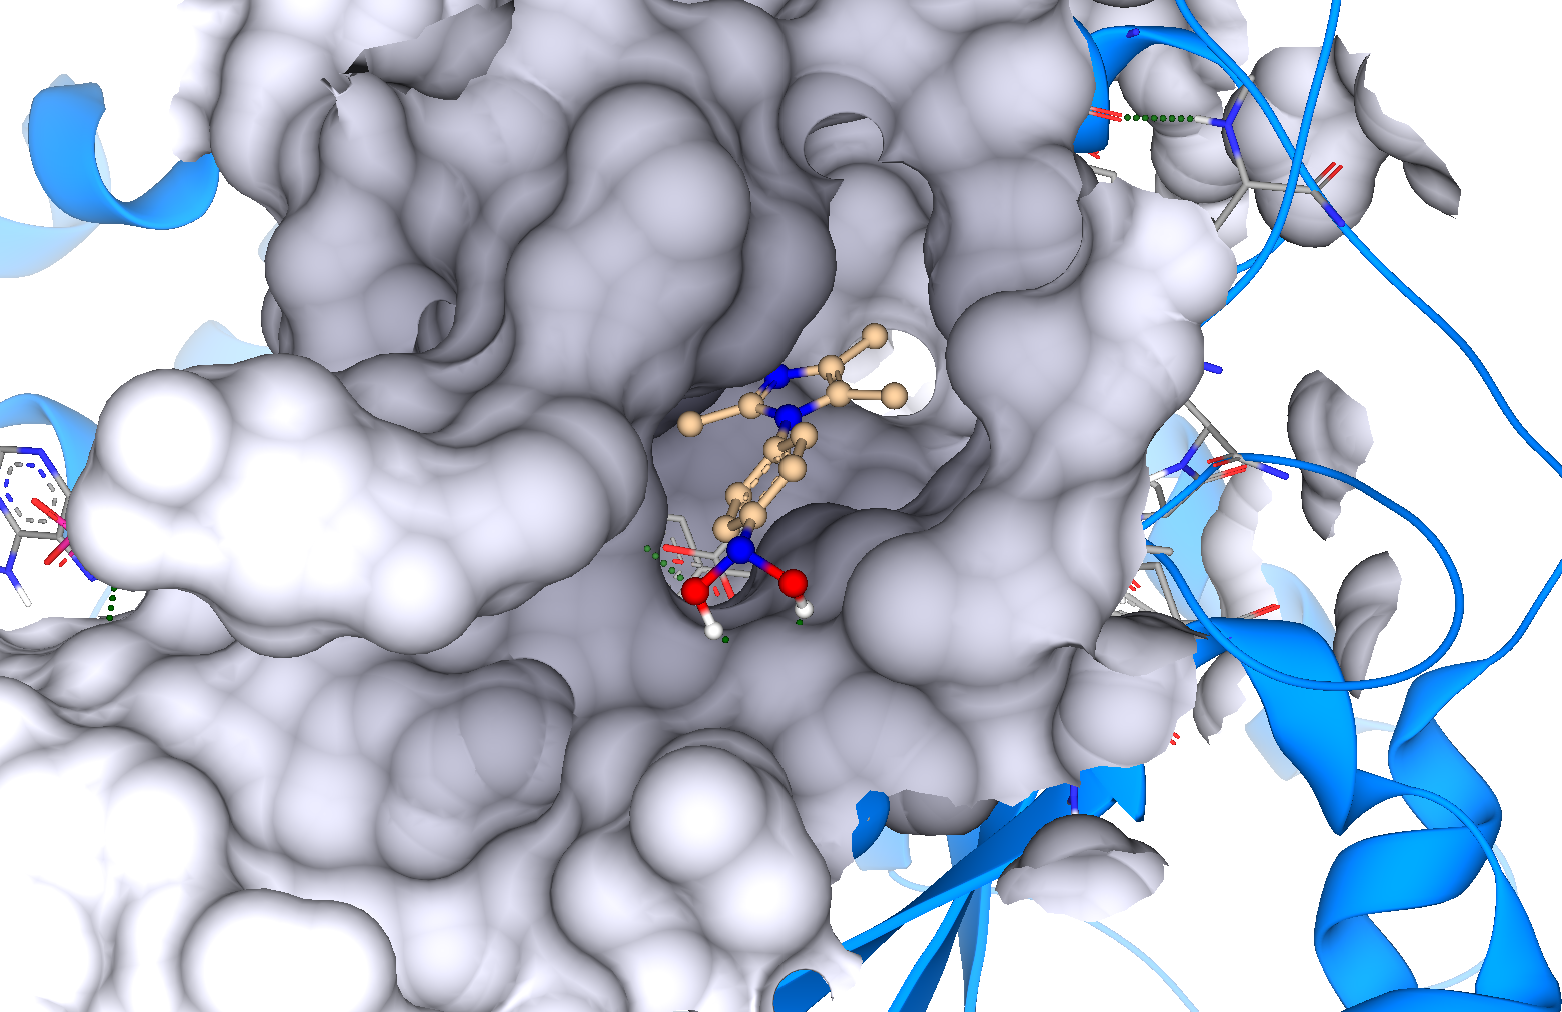


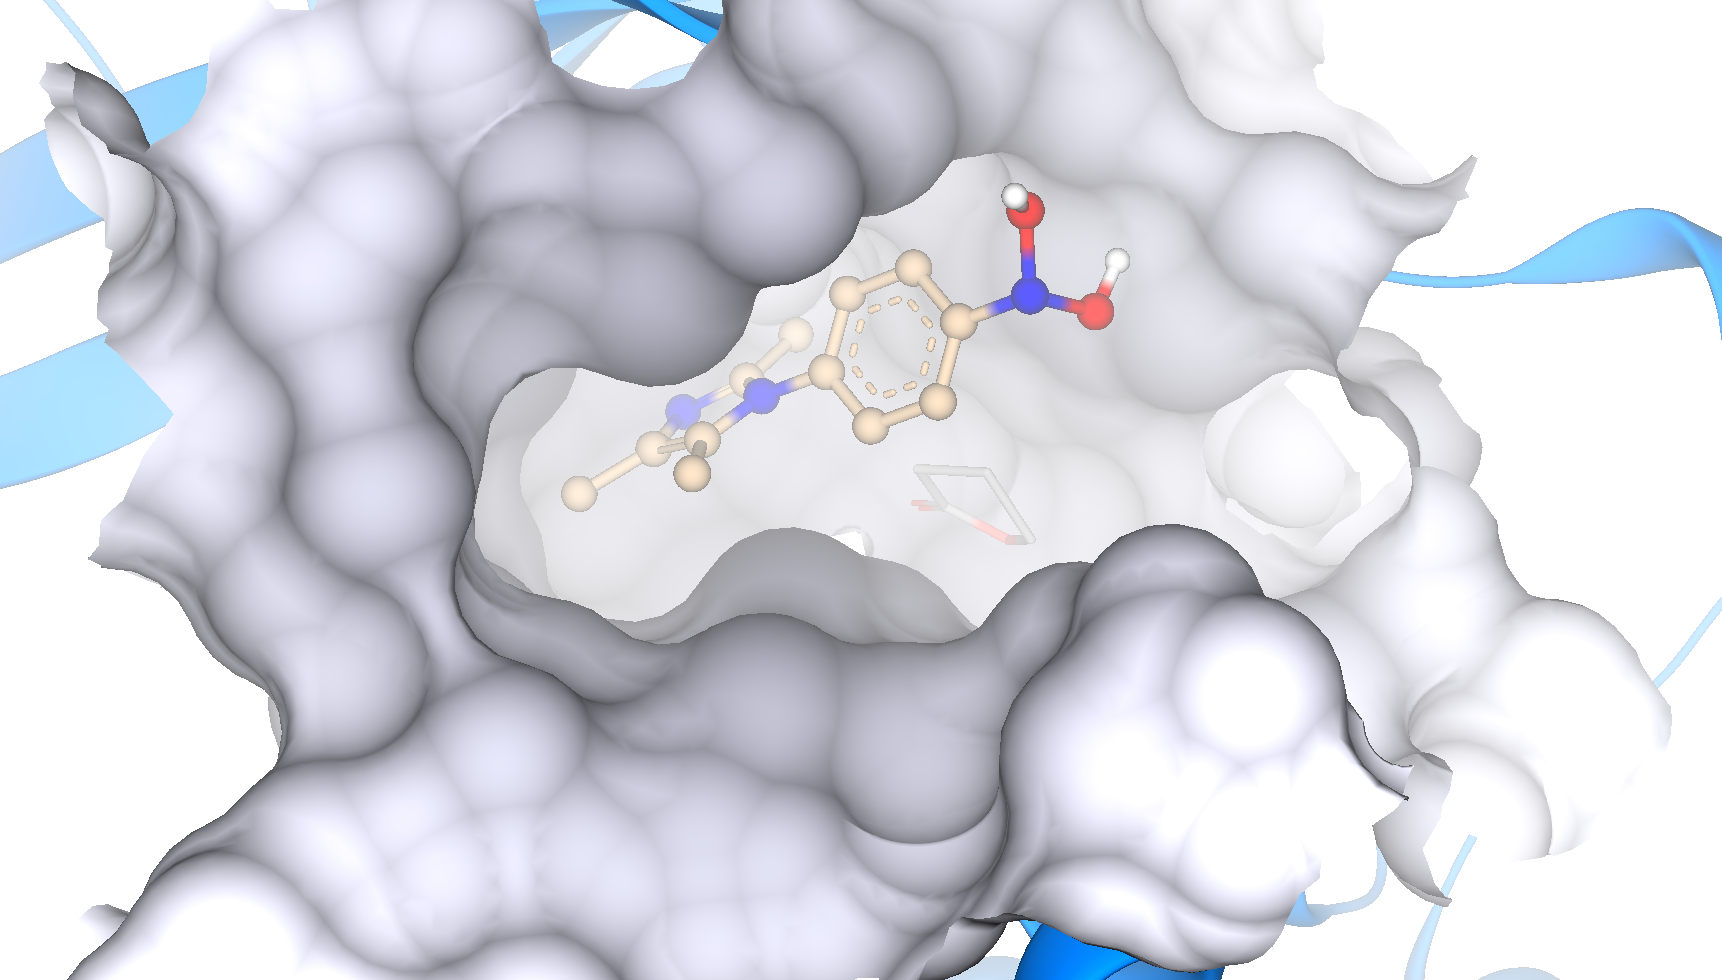


**M3 in 1XF0 M3 in 3F66**

**
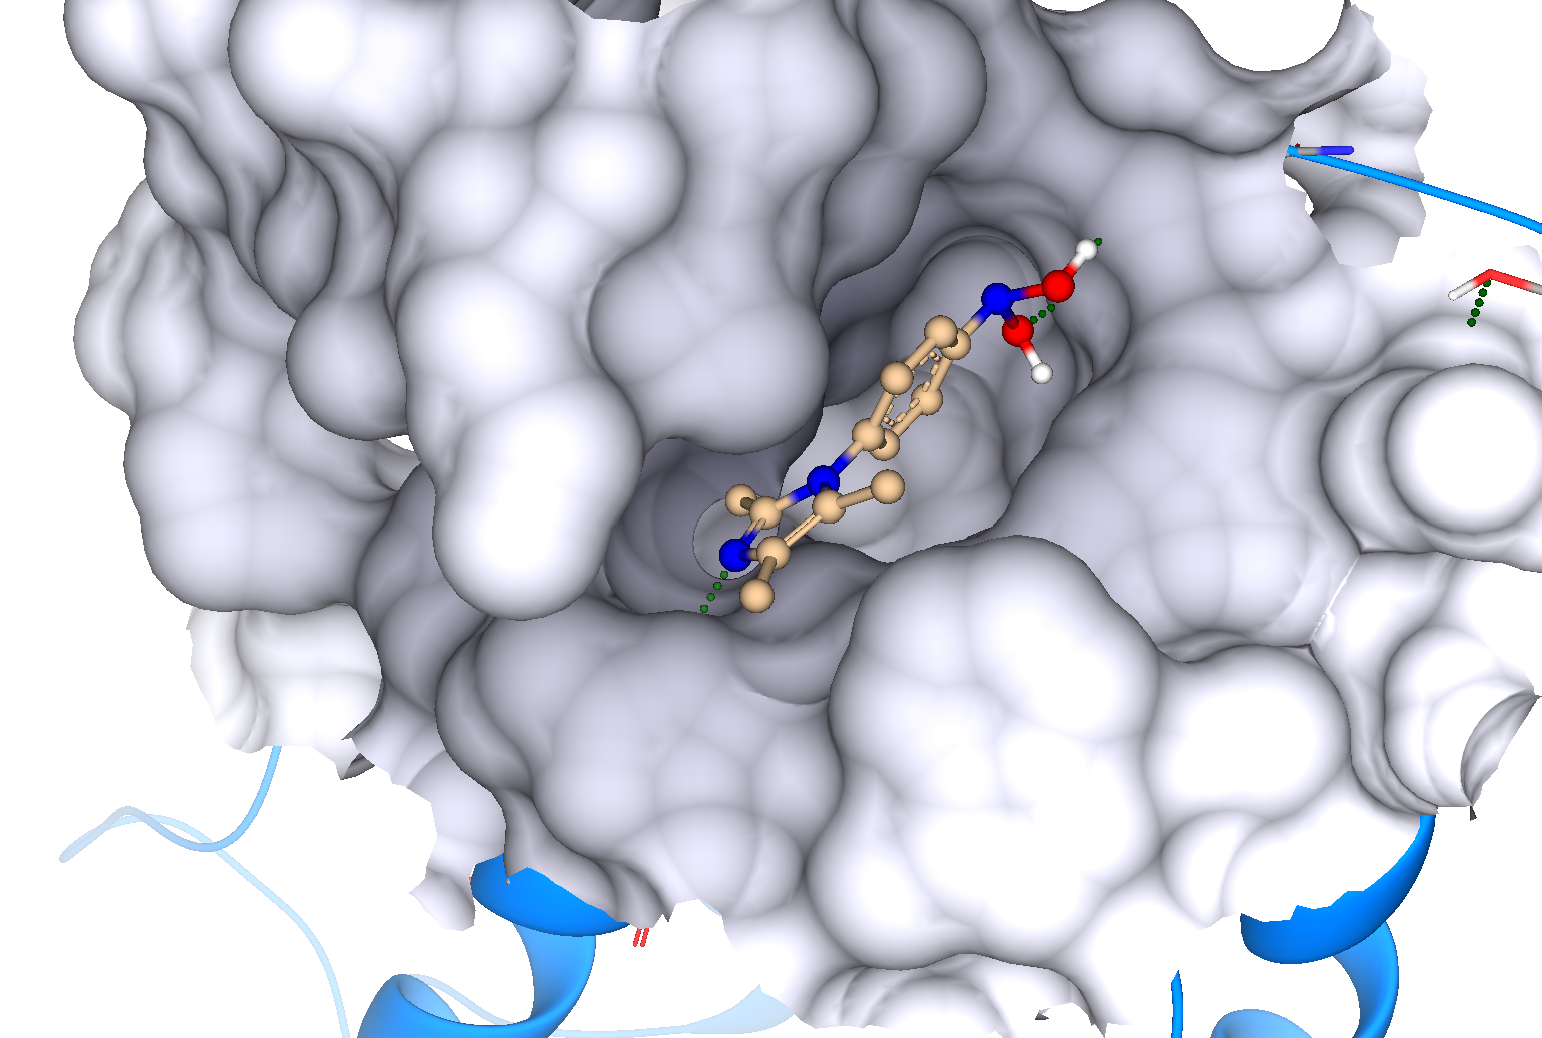

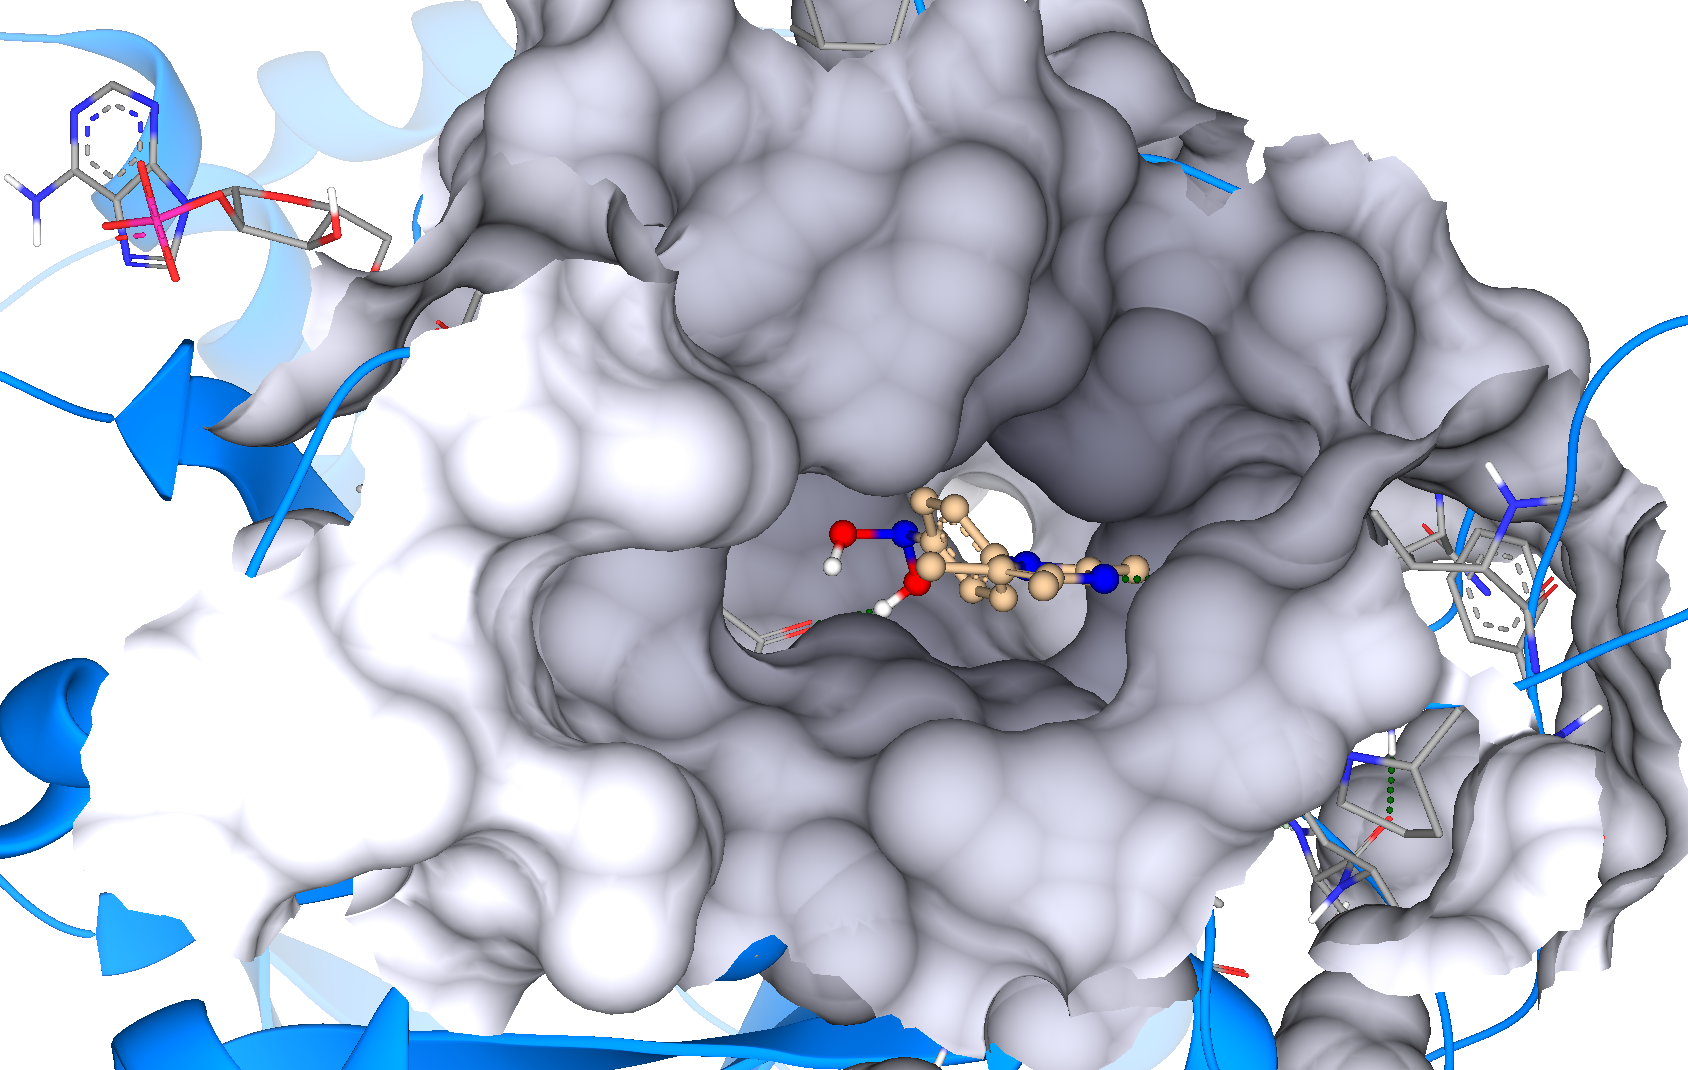
**

**M3 in 4XVE M3 in 5Y8Y**

**Molecule M4**

**LogS** = 4,931 (Intrinsic aqueous solubility)

**LogP** = 1,33

**BBB (Blood-Brain-Barrier) log ([brain]:[blood])** = -0,145

**TPSA (Topological Polar Surface Area)** = 28,7,5 Å2 (> 140 Å2 : bad, < 90 Å2 : good)


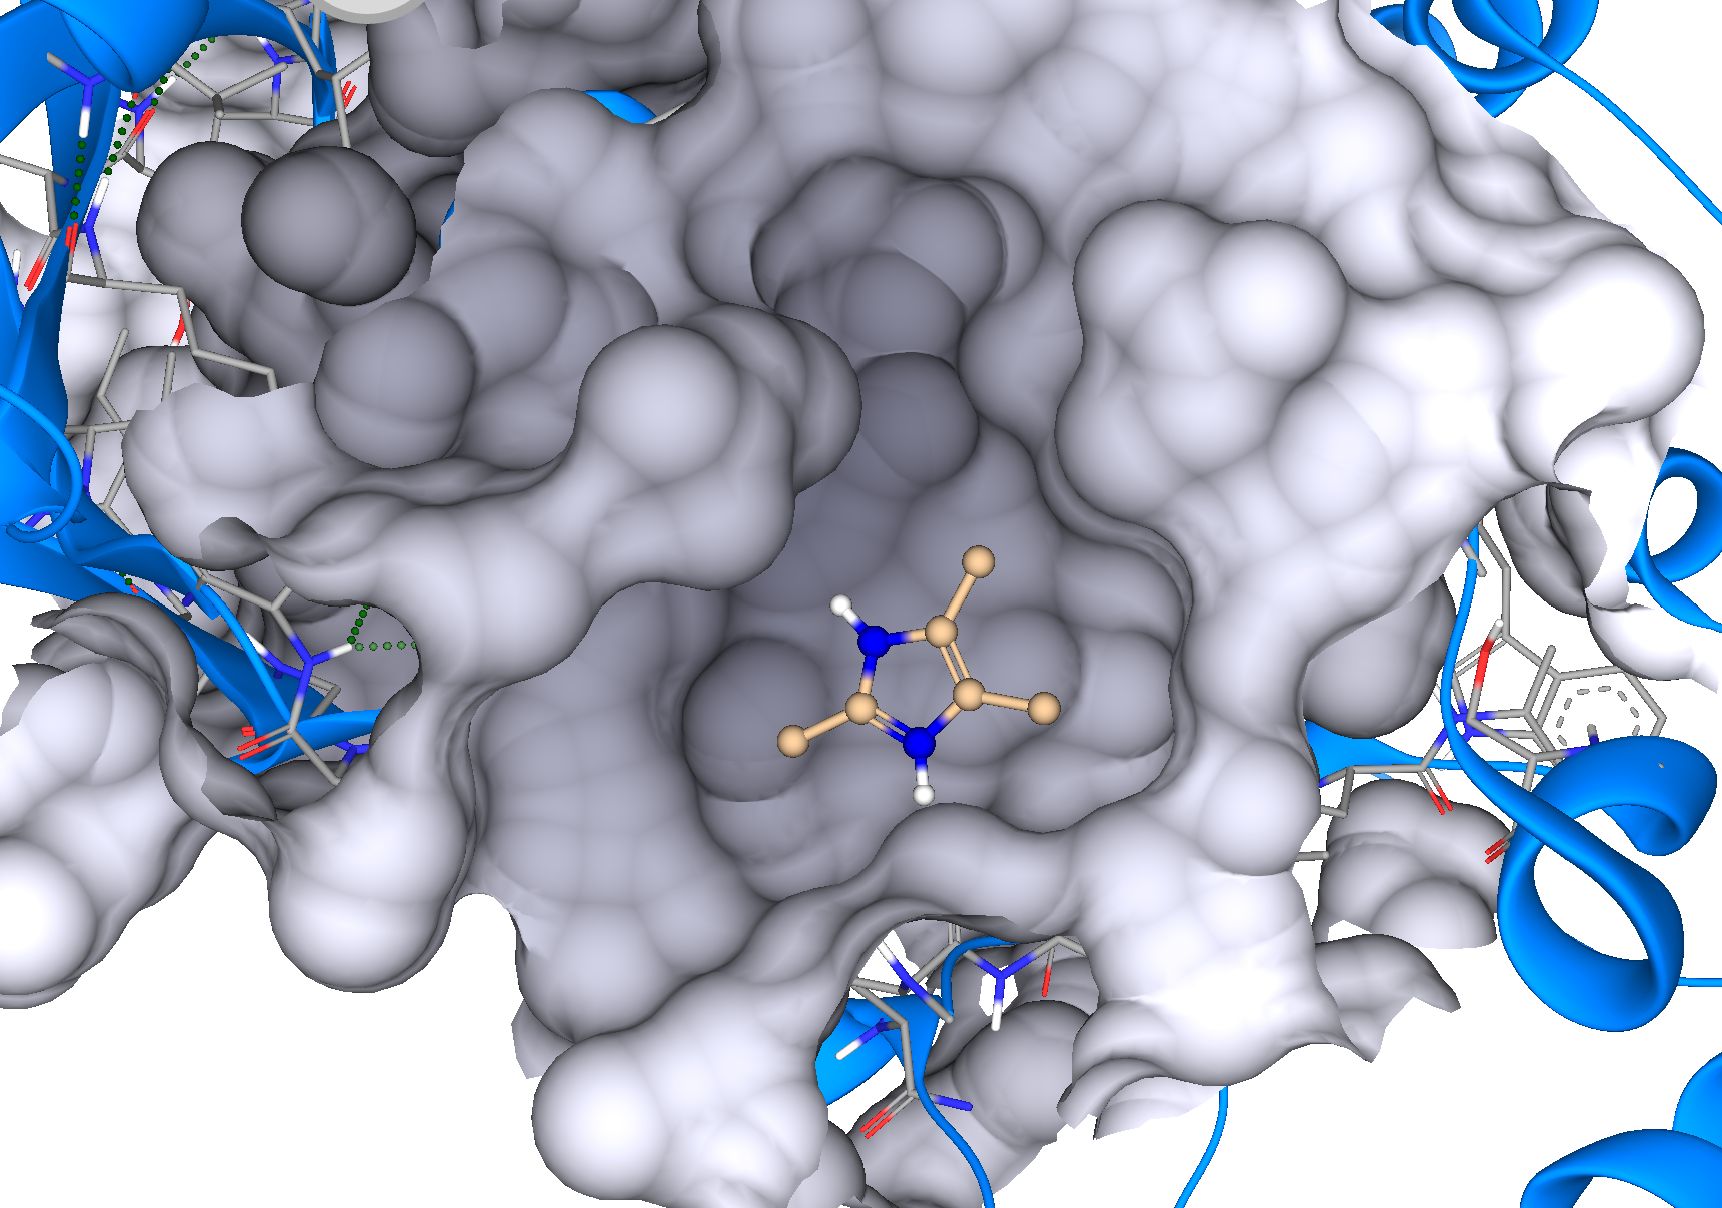

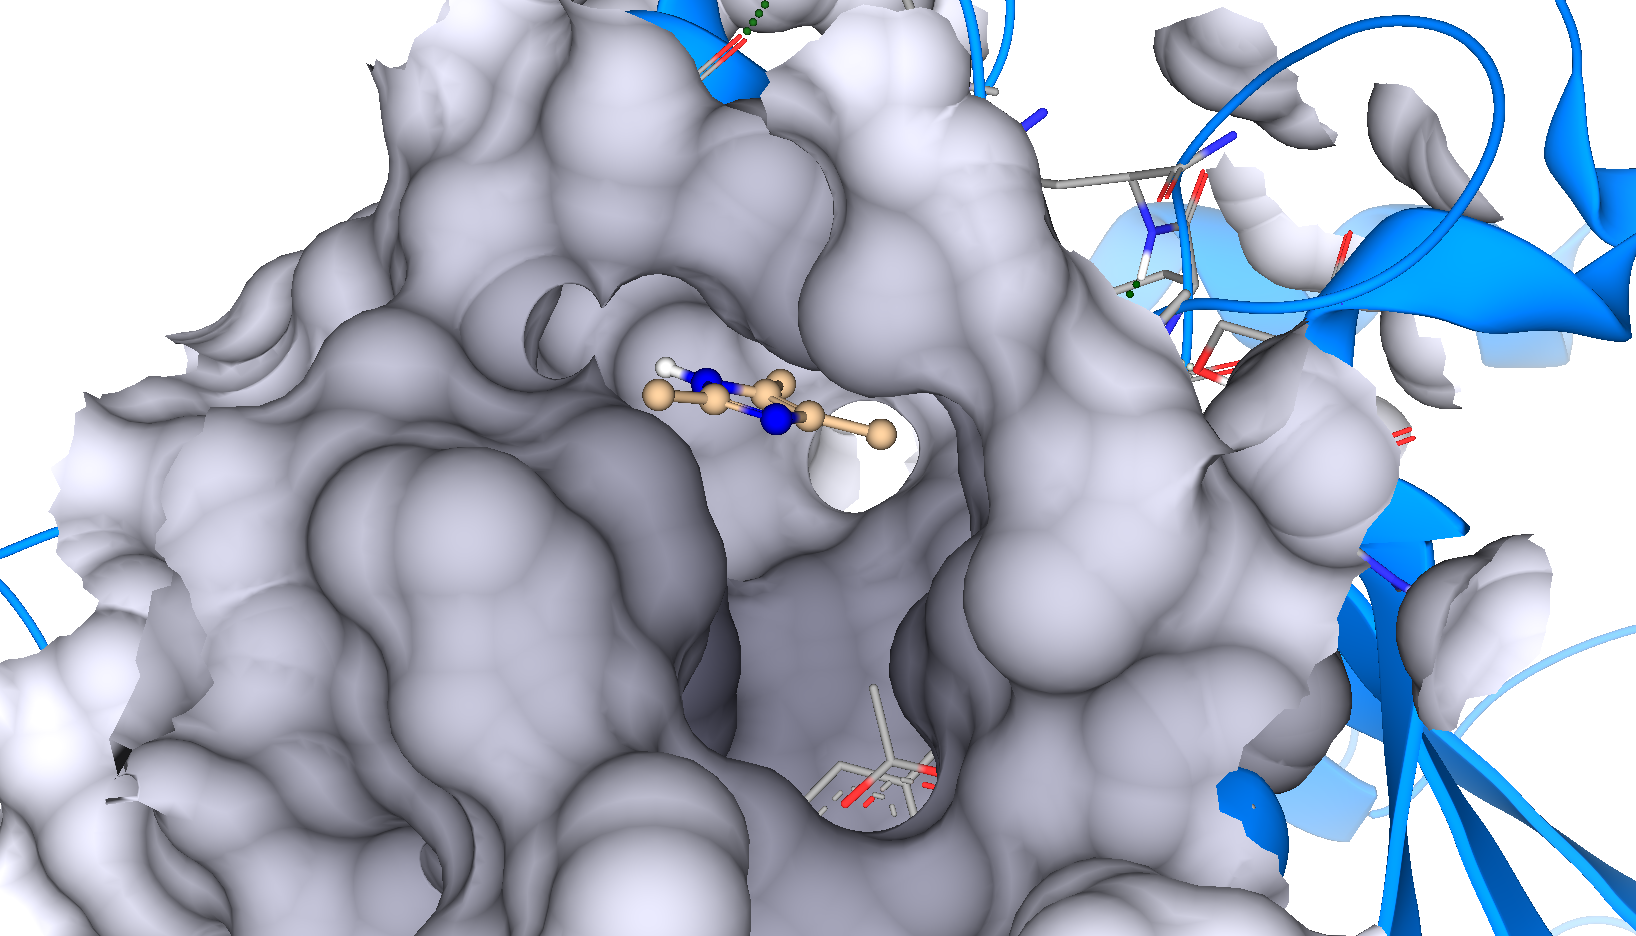


**M4 in 1XF0 M4 in 3F66**

**
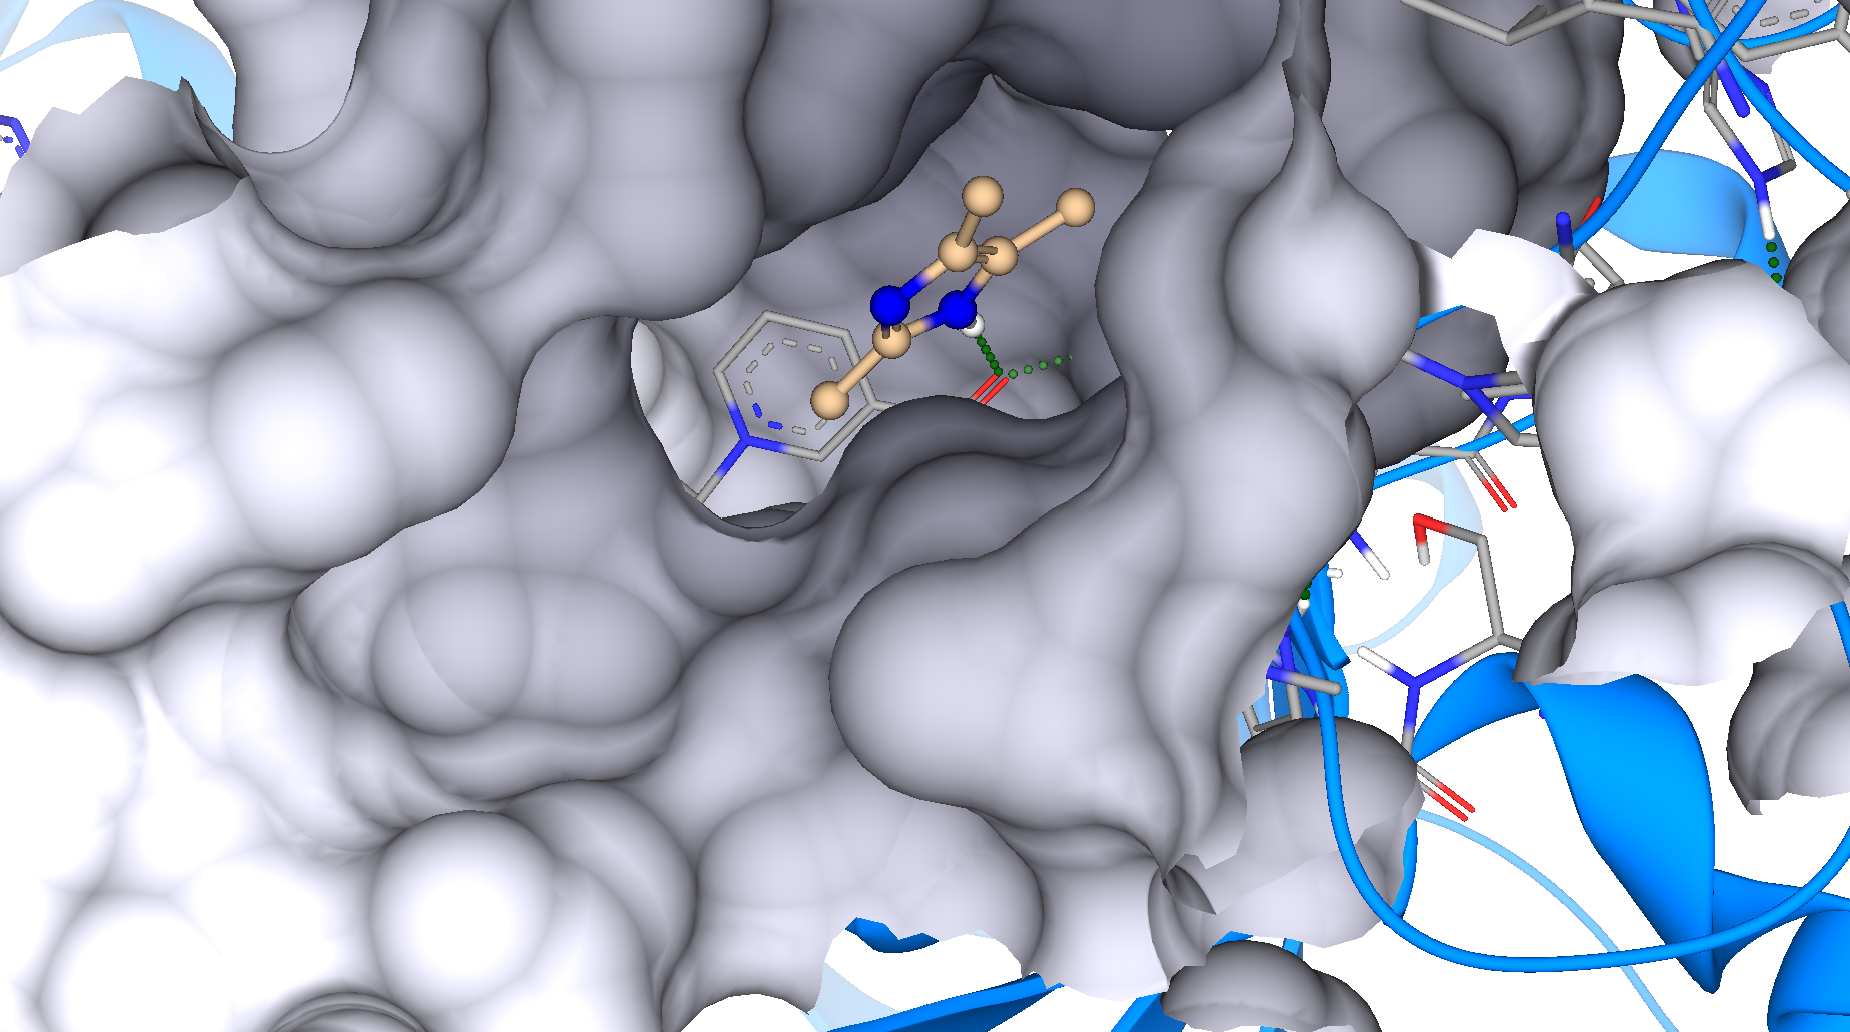
**

**
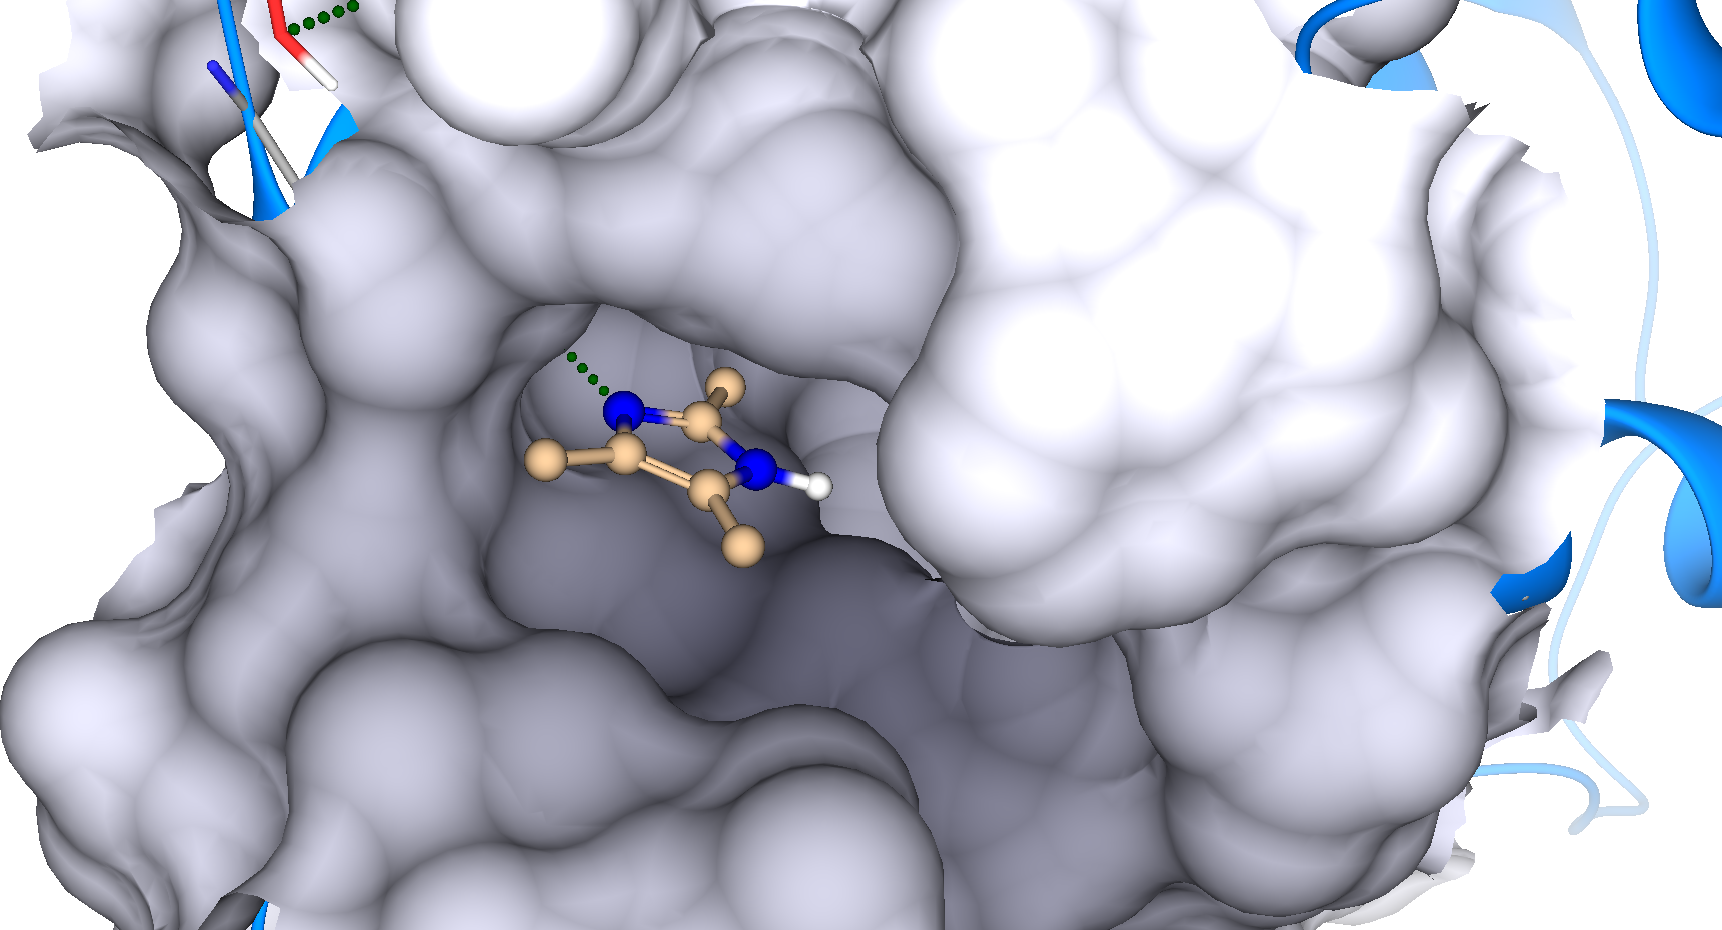
**

**M4 in 4XVE M4 in 5Y8Y**
