# Supplementary figures and images for: Benchmarking Mechanistic Structural, Molecular Docking, ADMET and Biological Properties of Methyl- Imidazole Derivatives: Potential Anti-Cancer Agents
Source: Research Square preprint supplement (doi:10.21203/rs.3.rs-3934643/v1), 2024-02-15

**Graphical Abstract**


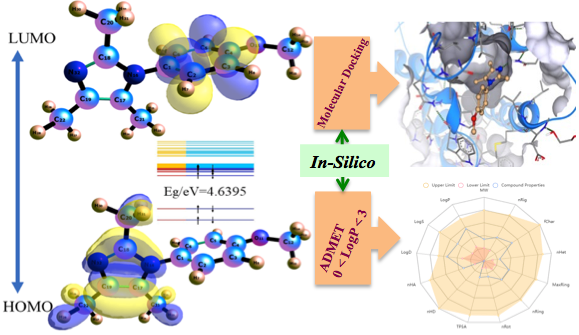

Supplement: Supplementary file 1 [file b0264df8972835afed731d60.docx]
